## Active NaCl absorption across posterior gills of hyperosmoregulating *Chasmagnathus granulatus*

Horst Onken<sup>1,\*</sup>, Martin Tresguerres<sup>2</sup> and Carlos M. Luquet<sup>2</sup>

<sup>1</sup>Departamento de Biologia, Faculdade de Filosofia, Ciências e Letras de Ribeirão Preto, Universidade de São Paulo, Avenida Bandeirantes 3900, Ribeirão Preto 14040-901, SP, Brasil and <sup>2</sup>Departamento de Biodiversidad y Biología Experimental, Facultad de Ciencias Exactas y Naturales, Universidad de Buenos Aires, Pab. II, Ciudad Universitaria, C1428EHA Buenos Aires, Argentina

\*Author for correspondence (e-mail: onkenh@ffclrp.usp.br)

Accepted 10 January 2003

### Summary

Split lamellae of posterior gills of *Chasmagnathus granulatus* adapted to 2.5‰ salinity were mounted in a modified Ussing chamber. With NaCl-saline on both sides of the preparation a transepithelial voltage ( $V_{te}$ ) of  $4.1 \pm 0.5$  mV (outside positive) was measured. After voltage-clamping, the negative short-circuit current ( $I_{sc}$ ) amounted to  $-142 \pm 21 \mu\text{A cm}^{-2}$  at a conductance ( $G_{te}$ ) of  $44 \pm 5$  mS  $\text{cm}^{-2}$ . Substitution of either chloride (by nitrate) or sodium (by choline) on both sides of split gill lamellae significantly reduced  $I_{sc}$  (by 70–80%) and  $G_{te}$  (by 30–50%). External CsCl (but not BaCl<sub>2</sub> or furosemide) inhibited the negative  $I_{sc}$  without affecting  $G_{te}$ . Addition of ouabain, BaCl<sub>2</sub> or diphenylamine-2-carboxylate to the internal bath inhibited  $I_{sc}$  at unchanged  $G_{te}$ . Internal acetazolamide did not affect  $I_{sc}$  or  $G_{te}$  across split gill

lamellae. Unidirectional Na<sup>+</sup> influx across isolated and perfused posterior gills, however, was reduced by internal acetazolamide by approximately 20% at constant  $V_{te}$ . The results suggest that posterior gills of hyperosmoregulating *C. granulatus* display a high conductance epithelium that actively absorbs NaCl in a coupled way by an electrogenic mechanism similar to that seen in the thick ascending limb of Henle's loop and, to a minor degree, by an electroneutral mechanism, presumably *via* apical Na<sup>+</sup>/H<sup>+</sup>- and Cl<sup>-</sup>/HCO<sub>3</sub><sup>-</sup>-antiports.

Key words: *Chasmagnathus granulatus*, Crustacea, crab gill, flux measurement, ion transport, osmoregulation, short-circuit current, transepithelial conductance, ion substitution, inhibitor, Ussing chamber.

### Introduction

To maintain an outward-directed osmotic gradient, hyperosmoregulating Crustacea compensate their passive salt loss by active NaCl absorption across the gills (for a review, see Mantel and Farmer, 1983). It has been shown for numerous crabs that only the posterior gills are responsible for active NaCl absorption, whereas the anterior gills are specialised for respiration (for reviews, see Péqueux et al., 1988; Péqueux, 1995). Mainly based on measurements with whole, perfused crab gills, it has been proposed that active NaCl absorption proceeds *via* apical Na<sup>+</sup>/H<sup>+</sup>- and Cl<sup>-</sup>/HCO<sub>3</sub><sup>-</sup> antiports (Gilles and Péqueux, 1986; Péqueux et al., 1988; Lucu, 1990), although this hardly explains the transbranchial voltage measured in various crab species.

After refining the study of ion transport across crab gills using split gill lamellae mounted in modified Ussing chambers (Schwarz and Graszynski, 1989), the basic epithelial properties and transport mechanisms could be analysed more unambiguously. Posterior gills of crabs from freshwater display a tight epithelium and a mechanism of NaCl absorption similar to that of other freshwater animals such as fish and amphibia (Goss et al., 1992; Larsen, 1988,

1991). For Chinese crabs *Eriocheir sinensis* adapted to freshwater, Na<sup>+</sup> absorption was shown to proceed *via* apical Na<sup>+</sup> channels and the basolateral Na<sup>+</sup>/K<sup>+</sup>-ATPase, generating a positive short-circuit current in the absence of external Cl<sup>-</sup> (Zeiske et al., 1992). The negative short-circuit current in the presence of external Cl<sup>-</sup> was analysed to reflect Na<sup>+</sup>-independent Cl<sup>-</sup> absorption *via* apical Cl<sup>-</sup>/HCO<sub>3</sub><sup>-</sup> antiport and basolateral Cl<sup>-</sup> channels, driven by an apical V-type H<sup>+</sup> pump (Onken et al., 1991; Onken and Putzenlechner, 1995). With *in vivo*-like, low external NaCl, the positive and negative currents short-circuit each other and enable transcellular NaCl absorption (Onken, 1999). The posterior gills of the hololimnetic *Dilocarcinus pagei* yielded similar results to Chinese crab posterior gills (Onken and McNamara, 2002). On the other hand, posterior gills of the shore crab *Carcinus maenas*, which is a strong hyperosmoregulator but unable to survive in freshwater, were found to be much more leaky (Onken and Siebers, 1992). Under short-circuit conditions a tight 1:2 coupling between Na<sup>+</sup> and Cl<sup>-</sup> absorption was observed (Riestenpatt et al., 1996). In these animals NaCl absorption is exclusively driven by the Na<sup>+</sup>/K<sup>+</sup>-ATPase, and

the negative short-circuit current seems to reflect NaCl absorption, as in the thick ascending limb of Henle's loop of the mammalian nephron (Greger and Kunzelmann, 1990) *via* apical  $\text{Na}^+/\text{K}^+/\text{2Cl}^-$  symport with an apical  $\text{K}^+$  recycling *via*  $\text{K}^+$  channels (Riestenpatt et al., 1996).

*Chasmagnathus granulatus* is a strong hyper- and hypo-osmoregulating crab that inhabits intertidal, estuarine coasts of Brazil, Uruguay and Argentina (Mougabure Cueto, 1998; Charmantier et al., 2002). The thickness of the posterior gill epithelium increases when the animals are adapted to either low or high salinities, suggesting the involvement of the gills in salt absorption of hyperosmoregulating crabs and in salt secretion in hypo-osmoregulating animals (Genovese et al., 2000). In a recent study with perfused posterior gills, the respective active transbranchial absorption and secretion of  $\text{Na}^+$  have been directly demonstrated (Luquet et al., 2002); however, a satisfying analysis of the transport mechanisms is still lacking.

In the present study, the posterior gills of the euryhaline crab *C. granulatus* adapted to low salinity were investigated in order to obtain more detailed information about the transport mechanism responsible for active, transbranchial NaCl absorption in this species. The results indicate that at least the major part of NaCl is absorbed by an electrogenic mechanism that most likely resembles NaCl absorption across the gills of the shore crab *C. maenas*.

## Materials and methods

### Animals

*Chasmagnathus granulatus* Dana 1851 were collected at Faro San Antonio beach (36°18'S 56°48'W) at Samborombón Bay near the southern edge of the Rio de la Plata estuary, Argentina. In the laboratory, the intermolt crabs (28–32 mm carapace width) were kept at 20±2°C with a natural light:dark photoperiod. The animals were fed twice weekly with commercially available pellets of rabbit food. Prior to their use in the experiments, the crabs were adapted for at least 2 weeks to 2.5‰ salinity (artificial salt mixture 'Marinemix', Marine Enterprises International Inc., USA).

### Preparations

After killing the animals by rapidly destroying the ventral and dorsal ganglia, the carapace was lifted and the posterior gills removed.

For the Ussing chamber experiments, single posterior gill lamellae were isolated and split according to Schwarz and Graszynski (1989). The split gill lamellae thus obtained were mounted in an Ussing chamber modified after De Wolf and Van Driessche (1986). Preparation and mounting were conducted under microscopic control. Silicon grease (Bayer, Germany) was used to minimise edge damage. An epithelial area of 0.002 cm<sup>2</sup> was exposed to the chamber compartments, bathing the internal and external sides of the tissue. Continuous perfusion of both chamber compartments with aerated saline was achieved by gravity flow (approximately 2 ml min<sup>-1</sup>).

For the gill perfusion experiments, the afferent and efferent

vessels of a posterior gill were connected *via* fine polyethylene tubings to a peristaltic pump (afferent) and to a glass tube (efferent). The tubings were fixed in position with a small Lucite clamp covered with smooth neoprene to avoid gill damage and to isolate the gill interior from the bathing medium. The gill was bathed in a beaker containing approximately 50 ml of aerated saline and was perfused at a rate of 0.1 ml min<sup>-1</sup>, the perfusate being collected in a second beaker.

### Electrophysiology

In the Ussing chamber experiments the transepithelial voltage ( $V_{te}$ ) was measured using Ag/AgCl electrodes connected to both sides of the preparation (distance <1 mm) by agar bridges (3% agar in 3 mol l<sup>-1</sup> KCl). The reference electrode was in the internal bath. Silver wires coated with AgCl served as electrodes to apply current for short-circuiting  $V_{te}$  (measurement of the short-circuit current,  $I_{sc}^*$ ) from an automatic clamping device (VCC 600, Physiologic Instruments, USA). The area-specific resistance between the tips of the voltage electrodes ( $R_{tot}$ ) was calculated from imposed voltage pulses ( $\Delta V_{te}$ ) and the resulting current deflections ( $\Delta I$ ).  $R_{tot}$  is the sum of the serial resistances of the solutions ( $R_s$ ) and the tissue ( $R_{te}$ ). Because of the low values of  $R_{tot}$ , it was necessary to correct the  $R_{tot}$  and  $I_{sc}^*$  data to obtain values directly related to the preparations ( $R_{te}$ ,  $I_{sc}$ ).  $R_s$  was measured in the absence of a preparation separating the chamber compartments and was found to be 5.5 Ω cm<sup>2</sup> for NaCl saline, 7 Ω cm<sup>2</sup> for Na<sup>+</sup> saline, and 8 Ω cm<sup>2</sup> for Cl<sup>-</sup> saline. The corrected values for  $R_{te}$  are obtained by subtracting  $R_s$  from  $R_{tot}$ , while the correction of  $I_{sc}^*$  followed Ohm's law (see Riestenpatt et al., 1996). In the Results, only the corrected values of  $I_{sc}$  and  $G_{te}$  (1/ $R_{te}$ ) are given. In the figures displaying time courses, the original  $I_{sc}^*$  is shown, and the current deflections reflect the uncorrected conductance between the tips of the voltage electrodes.

During flux measurements with isolated and perfused whole gills, the transbranchial voltage was controlled with a millivoltmeter (Metrix, France) by connecting Ag/AgCl electrodes *via* agar bridges to the external bath and to the glass tube collecting the perfusate (internal side).

### Na<sup>+</sup> influx measurements

Na<sup>+</sup> influxes across isolated and perfused posterior gills were measured by applying <sup>22</sup>Na [final activity 9.25×10<sup>3</sup> Bq (0.25 μCi) ml<sup>-1</sup>] to the external bath. After 15 min of stabilization, the radioactivity appearing in the perfusate was measured at 10 min intervals using a gamma scintillation counter (Canberra series 35 plus, Canberra, USA). Sodium influx was calculated according to Lucu and Siebers (1986) and related to the fresh mass of the gill used.

### Salines and chemicals

The basic NaCl saline contained (in mmol l<sup>-1</sup>): 468 NaCl, 9.5 KCl, 7.5 MgCl<sub>2</sub>, 12.5 CaCl<sub>2</sub>, 5 Hepes, 2.5 NaHCO<sub>3</sub> and 5 glucose. In Na<sup>+</sup>-free saline NaCl was replaced by choline chloride and NaHCO<sub>3</sub> by KHCO<sub>3</sub>. KCl was reduced to

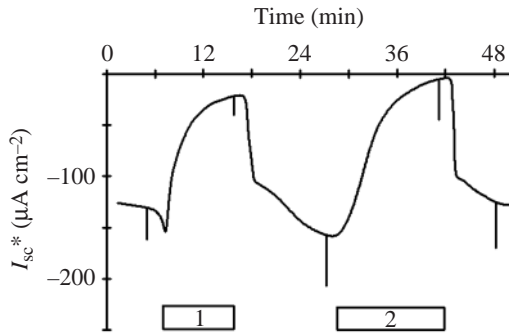

Fig. 1. Representative time course of measured  $I_{sc}$  ( $I_{sc}^*$ ) across split lamellae of posterior gills of *C. granulatus*, showing the effects of replacing  $\text{Cl}^-$  (1, by nitrates) or  $\text{Na}^+$  (2, by choline) on both sides of the tissue. The vertical current deflections are due to 1 mV voltage pulses and reflect the uncorrected conductance across the preparation.

$7 \text{ mmol l}^{-1}$ . In  $\text{Cl}^-$ -free saline the chlorides were replaced by the nitrates of the respective cations. Immediately before use, the pH of all salines was adjusted to 7.75.

All chemicals and reagents not mentioned separately below were purchased from Merck (Argentina).  $\text{NaHCO}_3$  was obtained from Mallinckrodt (USA).  $\text{CaCl}_2$  and HEPES were from J. T. Baker (USA). Ouabain and acetazolamide were purchased from Sigma (Germany). Diphenylamine-2-carboxylate was obtained from Fluka (Germany) and  $^{22}\text{Na}$  (as chloride) was from Amersham Pharmacia Biotech. (USA).

#### Statistics

All values are means  $\pm$  S.E.M. Differences between groups were tested using the paired Student's *t*-test. Significance was assumed at  $P < 0.05$ .

#### Results

When split lamellae of posterior gills of *Chasmagnathus granulatus* adapted to 2.5‰ salinity were mounted in the Ussing chamber, the preparations spontaneously generated a positive transepithelial voltage ( $V_{te}$ ) of  $4.1 \pm 0.5 \text{ mV}$  ( $N=7$ ). After short-circuiting the voltage, a negative short-circuit current ( $I_{sc}$ ) of  $-142 \pm 21 \mu\text{A cm}^{-2}$  and a conductance ( $G_{te}$ ) of  $44 \pm 5 \text{ mS cm}^{-2}$  ( $N=7$ ) were measured.

To analyse the ionic nature of the short-circuit current, ion substitution experiments were performed. On replacing  $\text{Cl}^-$  on both sides of the preparation by nitrate, the negative  $I_{sc}$  significantly decreased by approximately 75% from  $-124 \pm 16$  to  $-32 \pm 5 \mu\text{A cm}^{-2}$  ( $N=5$ ). At the same time the conductance of the preparation also decreased from  $45 \pm 3$  to  $22 \pm 2 \text{ mS cm}^{-2}$  ( $N=5$ ). After readministering  $\text{Cl}^-$  on both sides of the tissue,  $I_{sc}$  was found to be completely reversible ( $-149 \pm 29 \mu\text{A cm}^{-2}$ ;  $N=5$ ). In most cases the new control current was even more negative than before  $\text{Cl}^-$  substitution. The conductance of the split gill lamellae increased to  $63 \pm 3 \text{ mS cm}^{-2}$  ( $N=5$ ) after readministering  $\text{Cl}^-$ . A decrease in

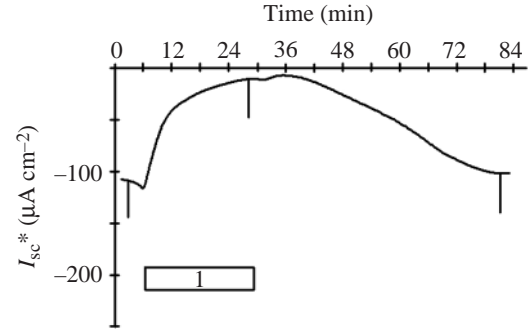

Fig. 2. Representative time course of  $I_{sc}^*$  across split lamellae of posterior gills of *C. granulatus*, showing the influence of internal addition of  $5 \text{ mmol l}^{-1}$  ouabain (1). The vertical current deflections are due to 1 mV voltage pulses and reflect the uncorrected conductance across the preparation.

negative  $I_{sc}$  and  $G_{te}$  similar to that obtained after substitution of  $\text{Cl}^-$  was also observed when  $\text{Na}^+$  was replaced by choline. In this case the negative  $I_{sc}$  decreased from  $-132 \pm 34$  to  $-23 \pm 5 \mu\text{A cm}^{-2}$  ( $N=5$ ) and the conductance of the split gill lamellae decreased from  $61 \pm 8$  to  $45 \pm 8 \text{ mS cm}^{-2}$  ( $N=5$ ). After returning to  $\text{NaCl}$  salines, current and conductance returned to the control values seen before substitution of  $\text{Na}^+$ . A representative example of the above-described ion substitution experiments is shown in Fig. 1.

Thus far, the polarity of  $V_{te}$  and  $I_{sc}$ , and the current reductions after substitution of  $\text{Na}^+$  or  $\text{Cl}^-$  indicate that the negative  $I_{sc}$  reflects  $\text{Na}^+$ -coupled  $\text{Cl}^-$  absorption. To analyse the transport mechanism in more detail, several inhibitors of transport proteins were used. Applying  $5 \text{ mmol l}^{-1}$  ouabain, a specific inhibitor of the  $\text{Na}^+/\text{K}^+$ -ATPase (Skou, 1965), to the internal perfusion medium, resulted in a significant decrease of the negative  $I_{sc}$  by approximately 80% from  $-110 \pm 16$  to  $-22 \pm 8 \mu\text{A cm}^{-2}$  ( $N=6$ ). The effect of ouabain on  $I_{sc}$  was slowly reversible. The conductance of split gill lamellae was not affected by internal ouabain. A representative time course of an experiment with ouabain is shown in Fig. 2. Internal addition of  $2 \text{ mmol l}^{-1}$  diphenylamine-2-carboxylate (DPC), an inhibitor of  $\text{Cl}^-$  channels (Di Stefano et al., 1985), significantly reduced the negative  $I_{sc}$  (from  $-92 \pm 11$  to  $-25 \pm 6 \mu\text{A cm}^{-2}$ ;  $N=5$ ) at constant  $G_{te}$ . The effect of DPC on  $I_{sc}$  was slowly but completely reversible. The primary solvent for DPC, dimethylsulfoxide, was always applied alone and at the same concentration before DPC. The minor current decreases (see Fig. 3) were taken into consideration when the DPC effects were quantified. Internal  $\text{BaCl}_2$  ( $10 \text{ mmol l}^{-1}$ ), a blocker of  $\text{K}^+$  channels (Van Driessche and Zeiske, 1985), decreased the negative  $I_{sc}$  from  $-135 \pm 13$  to  $-31 \pm 7 \mu\text{A cm}^{-2}$  ( $N=4$ ) at unchanged  $G_{te}$ . To avoid influences of  $\text{Cl}^-$  diffusion currents,  $\text{BaCl}_2$  was first applied to the external bath (where it had no effect on current or conductance), and afterwards added to the internal perfusion medium. A representative experiment showing the influences of  $\text{BaCl}_2$  and DPC is shown in Fig. 3.

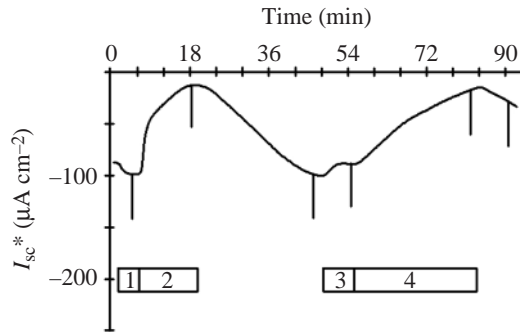

Fig. 3. Representative time course of  $I_{sc}^*$  across split lamellae of posterior gills of *C. granulatus*, showing the effects of internal addition of  $10 \text{ mmol l}^{-1}$   $\text{BaCl}_2$  (2) and  $2 \text{ mmol l}^{-1}$  diphenylamine-2-carboxylate (4, DPC as free acid). At (1)  $\text{BaCl}_2$  was added to the external bath as a control for diffusive movements of  $\text{Ba}^{2+}$  and  $\text{Cl}^-$ . At (3) dimethylsulfoxide, the primary solvent for DPC, was added to the internal solution. The vertical current deflections are due to  $1 \text{ mV}$  voltage pulses and reflect the uncorrected conductance across the preparation.

Internal addition of acetazolamide ( $0.1 \text{ mmol l}^{-1}$ ), an inhibitor of carbonic anhydrases (Maren, 1967), had no effect on  $I_{sc}$  or  $G_{te}$  ( $N=4$ ; not shown).

Neither  $\text{BaCl}_2$  ( $10 \text{ mmol l}^{-1}$ ;  $N=4$ , see above and Fig. 3) nor furosemide ( $N=4$ ; not shown), a blocker of  $\text{Na}^+/\text{K}^+/\text{2Cl}^-$  symporters (Greger and Kunzelmann, 1990), showed any effects on current and conductance across *C. granulatus* split gill lamellae when applied to the external bathing medium. External  $\text{Cs}^+$  ions ( $50 \text{ mmol l}^{-1}$   $\text{CsCl}$ ), another inhibitor of  $\text{K}^+$  channels (cf. Van Driessche and Zeiske, 1985), however, reduced the negative  $I_{sc}$  from  $-135 \pm 18$  to  $-29 \pm 10 \mu\text{A cm}^{-2}$  ( $N=3$ ) when applied to the external bath. The conductance of the tissue remained unchanged in the presence of  $\text{CsCl}$ . To reveal a possible contribution of inward-diffusing  $\text{Cs}^+$  ions to the reduction of the negative  $I_{sc}$ , the above values were also determined after adding the same amount of  $\text{CsCl}$  to the internal bath. This, however, resulted only in minimal recoveries of the negative current, showing that  $\text{Cs}^+$  diffusion is very low or almost equal to  $\text{Cl}^-$  diffusion. The effect of external  $\text{Cs}^+$  on the current was reversible. An example of the experiments with  $\text{CsCl}$  is shown in Fig. 4.

Although external furosemide had no effect on  $I_{sc}$ , the results so far collected suggest that the negative current reflects electrogenic,  $\text{Na}^+$ -coupled  $\text{Cl}^-$  absorption, as in the gills of *Carcinus maenas* (Riestenpatt et al., 1996). To evaluate a possible contribution of an electroneutral uptake *via* apical  $\text{Na}^+/\text{H}^+$ - and  $\text{Cl}^-/\text{HCO}_3^-$ -antiports to overall  $\text{NaCl}$  absorption, we measured the influence of acetazolamide ( $0.1 \text{ mmol l}^{-1}$ ) on unidirectional  $\text{Na}^+$  influx across isolated and perfused posterior gills of *C. granulatus*. In five experiments the drug significantly reduced the mean  $\text{Na}^+$  influx from  $1211 \pm 179$  to  $979 \pm 188 \mu\text{mol h}^{-1} \text{ g}^{-1}$  ( $N=5$ ; see Fig. 5) without affecting the transbranchial voltage.

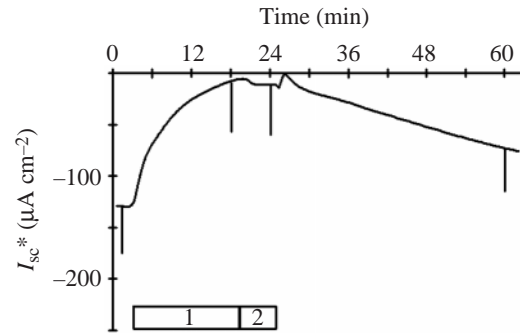

Fig. 4. Representative time course of  $I_{sc}^*$  across split lamellae of posterior gills of *C. granulatus*, showing the influence of external addition of  $50 \text{ mmol l}^{-1}$   $\text{CsCl}$  (1). At (2)  $\text{CsCl}$  was also added to the internal bath as a control for diffusive movements of  $\text{Cs}^+$  and  $\text{Cl}^-$ . The vertical current deflections are due to  $1 \text{ mV}$  voltage pulses and reflect the uncorrected conductance across the preparation.

## Discussion

### Methodical aspects

So far, split gill lamellae of three different crab species (*Eriocheir sinensis*, *Carcinus maenas* and *Dilocarcinus pagei*) have been successfully used to determine the basic characteristics of crab gill epithelia and the mechanisms of  $\text{NaCl}$  absorption (Onken and Riestenpatt, 1998; Onken and McNamara, 2002). However, *Chasmagnathus granulatus* and its gills are significantly smaller and it was necessary to use an Ussing chamber with a smaller epithelial surface ( $0.002 \text{ cm}^2$  instead of  $0.01$  or  $0.02 \text{ cm}^2$ ). Obviously this decreases the precision of the determined current and conductance values, and the contribution of edge damage may increase. Moreover, the smaller connection between the internal and external bathing medium may result in a larger unstirred layer in front of each side of the tissue. This may explain the relatively slow responses after solution changes observed in the present study.

Nevertheless, despite the above mentioned disadvantages the results of the present study clearly show that measurements with split gill lamellae of *C. granulatus* can be successfully

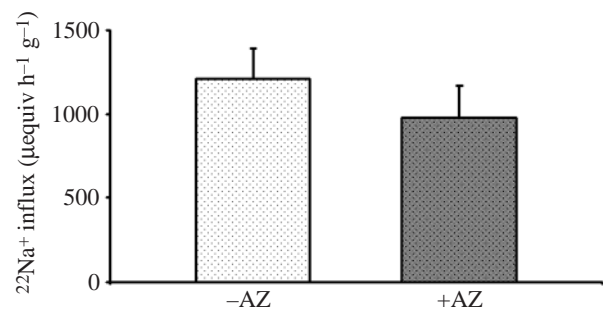

Fig. 5. Diagram showing the unidirectional influxes of  $\text{Na}^+$  across isolated posterior gills of *C. granulatus* in the absence (white column) and presence (grey column) of  $0.1 \text{ mmol l}^{-1}$  acetazolamide (AZ). Analysis of the two groups by paired Student's *t*-test revealed that the difference was significant at  $P=0.0007$ . See Materials and methods for details.

performed and result in useful information about the characteristics of the epithelium. The voltage across split gill lamellae was in exactly the same range as that in a recent study of isolated and perfused gills (Luquet et al., 2002), clearly showing that the splitting hardly damages the epithelium, and that edge damage is not a serious problem.

#### *Active NaCl absorption in C. granulatus posterior gills*

In diluted media, *C. granulatus* maintains an outward-directed osmotic gradient (Mougabure Cueto, 1998; Charmantier et al., 2002). When the animals were adapted from seawater to brackish water, the thickness of the posterior gill epithelium increased (Genovese et al., 2000), indicating its involvement in osmoregulatory active NaCl absorption, as observed in a variety of Crustacea (Péqueux et al., 1988). Recently, a ouabain-sensitive net influx of Na<sup>+</sup> was determined with isolated and perfused posterior gills (Luquet et al., 2002). The magnitudes of the transepithelial voltage ( $V_{te}$ ), short-circuit current ( $I_{sc}$ ) and conductance ( $G_{te}$ ) measured in the present study with NaCl salines on both sides of split lamellae of *C. granulatus* characterise the tissue as a leaky epithelium with a high conductance paracellular pathway. The negative  $I_{sc}$  was dependent on the presence of Na<sup>+</sup> and Cl<sup>-</sup> (see Fig. 1), indicating that the current reflects active, electrogenic and Na<sup>+</sup>-dependent Cl<sup>-</sup> absorption.

#### *The cuticle*

In Crustacea, the gill epithelium is covered on the apical side by cuticle. On the one hand, the presence of this chitinous layer is of advantage for measurements with split gill lamellae, because it gives the tissue a mechanical stability essential for preparation and mounting. On the other hand, the cuticle acts as serial resistance in front of the epithelium and as a barrier for drugs. In the crab species studied so far, the cuticular resistance was found to be very small when compared to the resistance of the whole preparation. In *C. maenas*, for example, the resistance of split gill lamellae was approximately 25  $\Omega$  cm<sup>2</sup> and the cuticular resistance was below 2  $\Omega$  cm<sup>2</sup> (Riestenpatt et al., 1996; Onken and Riestenpatt, 2002). Thus, its influence as serial resistance seems of minor importance. With respect to the cuticular permeability to inhibitors of transport proteins it is of interest that in *C. maenas*, neither furosemide nor amiloride seem to pass the cuticle (Riestenpatt et al., 1996; Onken and Riestenpatt, 2002). With respect to furosemide, the same may be the case for the gill cuticle of *C. granulatus* (see below). In the present investigation, the gill cuticle of *C. granulatus* has not been studied separately, and a detailed investigation of this layer should be performed in the future.

#### *The apical membrane*

Ba<sup>2+</sup> and Cs<sup>+</sup> ions are well-known blockers of K<sup>+</sup> channels (Van Driessche and Zeiske, 1985). With *C. maenas*, split gill lamellae, external Cs<sup>+</sup> inhibited the negative  $I_{sc}$  more effectively than Ba<sup>2+</sup> (Riestenpatt et al., 1996), although Cs<sup>+</sup> is usually a less potent inhibitor than Ba<sup>2+</sup> (Van Driessche and Zeiske, 1985). This result may reflect a different permeability

of the gill cuticle to the two cations, resulting in a better accessibility of the apical membrane by Cs<sup>+</sup>. Similarly, with *C. granulatus* split gill lamellae, external Ba<sup>2+</sup> levels had no effect on the negative  $I_{sc}$  (see Fig. 3), whereas high concentrations of external Cs<sup>+</sup> inhibited the current (see Fig. 4). The conductance of the preparation was not affected by external Cs<sup>+</sup>. However, a possible effect on the transcellular conductance might have been hidden by a conductance increase of the paracellular pathway due to the augmentation of the solution ionic strength after addition of CsCl. Besides their presence in tight NaCl absorbing epithelia, where they serve for K<sup>+</sup> secretion (Van Driessche and Zeiske, 1985), apical K<sup>+</sup> channels are often present in epithelia with K<sup>+</sup>-dependent cotransporters in the apical membrane, as in the vertebrate gastric epithelium (K<sup>+</sup>/H<sup>+</sup>-ATPase; Wolosin and Forte, 1984) or the thick ascending limb (TAL) of Henle's loop in the mammalian nephron (Na<sup>+</sup>/K<sup>+</sup>/2Cl<sup>-</sup> symport; Greger, 1985). In the TAL, the function of these K<sup>+</sup> channels is not only to supply the K<sup>+</sup>-dependent cotransporters with their substrate. They also contribute to the cell's negativity, supporting the movement of Cl<sup>-</sup> ions from the cell to the internal medium across the basolateral membrane, and they are the basis for the electrogenicity of the overall absorption process, allowing cation absorption along the paracellular pathway under open-circuit conditions.

As seen with split gill lamellae of the shore crab *C. maenas*, furosemide had no effect on  $I_{sc}$  or  $G_{te}$  across split gill lamellae of *C. granulatus*. In the shore crab, however, a dependence of Cl<sup>-</sup> absorption on potassium was demonstrated, and therefore it was concluded that NaCl absorption proceeds *via* apical Na<sup>+</sup>/K<sup>+</sup>/2Cl<sup>-</sup> symporters (Riestenpatt et al., 1996) in this species. So the presence of apical K<sup>+</sup> channels in an epithelium generating coupled NaCl absorption and a negative  $I_{sc}$  suggests the involvement of this symporter (see above, cf. Greger and Kunzelmann, 1990). Thus in *C. granulatus*, as in *C. maenas*, we propose that apical K<sup>+</sup> channels and Na<sup>+</sup>/K<sup>+</sup>/2Cl<sup>-</sup> symporters are the basis of electrogenic, coupled NaCl absorption (see Fig. 6).

As seen in the shore crab *C. maenas* (Onken and Siebers, 1992), acetazolamide, a blocker of the carbonic anhydrase (Maren, 1967), had no effect on  $I_{sc}$  or  $G_{te}$  across split gill lamellae of *C. granulatus*. However, approximately 20% of the Na<sup>+</sup> influx across isolated and perfused gills was inhibited by this drug (see Fig. 5) without affecting the transbranchial voltage. This finding suggests that at least a part of NaCl absorption depends on the rapid supply of H<sup>+</sup> and HCO<sub>3</sub><sup>-</sup>. We therefore propose that electrogenic NaCl absorption as described above is accompanied by electroneutral NaCl absorption *via* apical Na<sup>+</sup>/H<sup>+</sup>- and Cl<sup>-</sup>/HCO<sub>3</sub><sup>-</sup>-antiports (see Fig. 6), as has been described for the cortical TAL of the mouse and rat nephron (Greger, 1985). However, this proposal requires further investigation.

#### *The basolateral membrane*

The inhibition of  $I_{sc}$  by internal ouabain (see Fig. 2) is consistent with recent Na<sup>+</sup> flux measurements obtained with

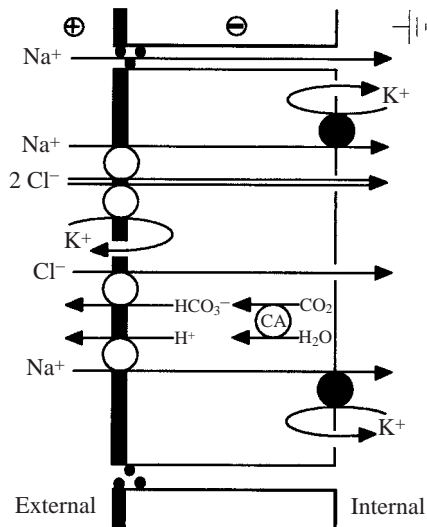

Fig. 6. Proposed functional model for active NaCl absorption across the gill epithelium of hyperosmoregulating *C. granulatus*.

isolated and perfused gills (Luquet et al., 2002) and shows that Na<sup>+</sup>-dependent Cl<sup>-</sup> absorption is driven by the basolateral Na<sup>+</sup>/K<sup>+</sup>-ATPase. The reduction in  $I_{sc}$  seen with the Cl<sup>-</sup> channel blocker DPC (Di Stefano et al., 1985; see Fig. 3) indicates that Cl<sup>-</sup> ions, which are most likely to be absorbed by a secondary active mechanism across the apical membrane (see above), exit from the cells *via* basolateral Cl<sup>-</sup> channels. The effect of internal BaCl<sub>2</sub> (see Fig. 3), similarly already observed with isolated and perfused gills (Luquet et al., 2002), indicates the presence of K<sup>+</sup> channels in the basolateral membrane. Their involvement in NaCl absorption can be considered as the basis for a negative cellular potential, participating in the driving force for the inward movement of Cl<sup>-</sup> ions through channels in the basolateral membrane. Na<sup>+</sup>/K<sup>+</sup>-ATPase, Cl<sup>-</sup> channels and K<sup>+</sup> channels (see above) are the usual 'equipment' present in basolateral membranes of many NaCl absorbing epithelia (Greger and Kunzelmann, 1990), and have also been found in the other crab gill epithelia studied so far (Onken et al., 1991; Riestenpatt et al., 1996; Onken and McNamara, 2002).

#### Comparative aspects

The results obtained in the present study clearly indicate that the basic epithelial characteristics and the mode of active NaCl absorption are very similar in hyperosmoregulating *C. maenas* and *C. granulatus*. Both animals are strong hyperosmoregulators which, however, are not able to survive in freshwater. The epithelium of the posterior gills of both animals displays a high conductance and a directly coupled NaCl absorption, similar to the TAL. It might well be that these characteristics are general features of animals from brackish waters, contrasting with the patterns of the gills of freshwater crabs and the absorptive epithelia of freshwater vertebrates (low conductance and electrical coupling of NaCl absorption *via* different pathways; see Introduction). It is obvious, however, that this hypothesis requires further studies on more animals from brackish waters.

Financial support by CAPES (Brazil), UBACYT (Argentina) and DAAD (Germany) is gratefully acknowledged. We also acknowledge Dr R. Marqués for allowing us to use the Radiochemistry laboratory and equipment.

#### References

- Charmantier, G., Gimenez, L., Charmantier-Daures, M. and Anger, K. (2002). Ontogeny of osmoregulation, physiological plasticity and larval export strategy in the grassid crab *Chasmagnathus granulata* (Crustacea, Decapoda). *Mar. Ecol. Prog. Ser.* **229**, 185-194.
- De Wolf, I. and Van Driessche, W. (1986). Voltage-dependent Ba<sup>2+</sup> block of K<sup>+</sup> channels in apical membrane of frog skin. *Am. J. Physiol.* **251C**, 696-706.
- Di Stefano, A., Wittner, M., Schlatter, E., Lang, H. J., Englert, H. and Greger, R. (1985). Diphenylamine-2-carboxylate, a blocker of the Cl<sup>-</sup>-conductive pathway in Cl<sup>-</sup>-transporting epithelia. *Pflüg. Arch.* **405**, 95-100.
- Genovese, G., Luquet, C. M., Paz, D. A., Rosa, G. A. and Pellerano, G. N. (2000). The morphometric changes in the gills of the estuarine crab *Chasmagnathus granulatus* under hyper- and hypo-regulation conditions are not caused by proliferation of specialized cells. *J. Anat.* **197**, 239-246.
- Gilles, R. and Péqueux, A. J. R. (1986). Physiological and ultrastructural studies of NaCl transport in crustacean gills. *Boll. Zool.* **53**, 173-182.
- Goss, G. G., Perry, S. F., Wood, C. M. and Laurent, P. (1992). Mechanisms of ion and acid-base regulation in the gills of freshwater fish. *J. Exp. Zool.* **263**, 143-159.
- Greger, R. (1985). Ion transport mechanisms in thick ascending limb of Henle's loop of mammalian nephron. *Physiol. Rev.* **65**, 760-797.
- Greger, R. and Kunzelmann, K. (1990). Chloride-transporting epithelia. In *Comparative Physiology. Basic Principles of Transport*, vol. 3 (ed. R. K. H. Kinne), pp. 84-114. Basel: Karger.
- Larsen, E. H. (1988). NaCl transport in amphibian skin. In *Advances in Comparative and Environmental Physiology*, vol. 1 (ed. R. Greger), pp. 189-248. Berlin: Springer.
- Larsen, E. H. (1991). Chloride transport by high-resistance heterocellular epithelia. *Physiol. Rev.* **71**, 235-283.
- Lucu, C. (1990). Ionic regulatory mechanisms in crustacean gill epithelia. *Comp. Biochem. Physiol.* **97**, 297-306.
- Lucu, C. and Siebers, D. (1986). Amiloride-sensitive sodium flux and potentials in perfused *Carcinus* gill preparations. *J. Exp. Biol.* **122**, 25-35.
- Luquet, C. M., Postel, U., Halperin, J., Urcola, M. R., Marques, R. and Siebers, D. (2002). Transepithelial potential differences and Na<sup>+</sup> flux in isolated perfused gills of the crab *Chasmagnathus granulatus* (Grapsidae) acclimated to hyper- and hypo-salinity. *J. Exp. Biol.* **205**, 71-77.
- Mantel, L. H. and Farmer, L. L. (1983). Osmotic and ionic regulation. In *The Biology of Crustacea*, vol. 5 (ed. L. H. Mantel), pp. 53-161. New York: Academic Press.
- Maren, T. H. (1967). Carbonic anhydrase: chemistry, physiology and inhibition. *Physiol. Rev.* **47**, 595-781.
- Mougabure Cueto, G. A. (1998). Interacción entre la regulación iónica y el equilibrio ácido-base en el cangrejo *Chasmagnathus granulata* Dana, 1851 (Decapoda, Grapsidae), pp. 1-55. Graduate thesis, Universidad de Buenos Aires.
- Onken, H. (1999). Active NaCl absorption across split lamellae of posterior gills of Chinese crabs (*Eriocheir sinensis*) adapted to different salinities. *Comp. Biochem. Physiol.* **123A**, 377-384.
- Onken, H., Graszynski, K. and Zeiske, W. (1991). Na<sup>+</sup>-independent electrogenic Cl<sup>-</sup> uptake across the posterior gills of the Chinese crab (*Eriocheir sinensis*): Voltage-clamp and microelectrode studies. *J. Comp. Physiol.* **161**, 293-301.
- Onken, H. and McNamara, J. C. (2002). Hyperosmoregulation in the red freshwater crab *Dilocarcinus pagei* (Brachyura, Trichodactylidae): structural and functional asymmetries of the posterior gills. *J. Exp. Biol.* **205**, 167-175.
- Onken, H. and Putzenlechner, M. (1995). A V-ATPase drives active, electrogenic and Na<sup>+</sup>-independent Cl<sup>-</sup> absorption across the gills of *Eriocheir sinensis*. *J. Exp. Biol.* **198**, 767-774.
- Onken, H. and Riestenpatt, S. (1998). NaCl absorption across split gill lamellae of hyperregulating crabs: transport mechanisms and their regulation. *Comp. Biochem. Physiol.* **119**, 883-893.
- Onken, H. and Riestenpatt, S. (2002). Ion transport across posterior gills of hyperosmoregulating shore crabs (*Carcinus maenas*): amiloride blocks the

- cuticular Na<sup>+</sup> conductance and induces current-noise. *J. Exp. Biol.* **205**, 523-531.
- Onken, H. and Siebers, D.** (1992). Voltage-clamp measurements on single split lamellae of posterior gills of the shore crab *Carcinus maenas*. *Mar. Biol.* **114**, 385-390.
- Péqueux, A.** (1995). Osmotic regulation in crustaceans. *J. Crust. Biol.* **15**, 1-60.
- Péqueux, A., Gilles, R. and Marshall, W. S.** (1988). NaCl transport in gills and related structures. In *Advances in Comparative and Environmental Physiology*, vol. 1 (ed. R. Greger), pp. 1-73. Berlin: Springer.
- Riessenpatt, S., Onken, H. and Siebers, D.** (1996). Active absorption of Na<sup>+</sup> and Cl<sup>-</sup> across the gill epithelium of the shore crab *Carcinus maenas*: voltage-clamp and ion-flux studies. *J. Exp. Biol.* **199**, 1545-1554.
- Schwarz, H. J. and Graszynski, K.** (1989). Ion transport in crab gills: a new method using isolated half platelets of *Eriocheir* gills in an Ussing-type chamber. *Comp. Biochem. Physiol.* **92A**, 601-604.
- Skou, J. C.** (1965). Enzymatic basis for active transport of Na<sup>+</sup> and K<sup>+</sup> across the cell membrane. *Physiol. Rev.* **45**, 596-617.
- Van Driessche, W. and Zeiske, W.** (1985). Ionic channels in epithelial cell membranes. *Physiol. Rev.* **65**, 833-903.
- Wolosin, J. M. and Forte, J. G.** (1984). Stimulation of oxyntic cell triggers K<sup>+</sup> and Cl<sup>-</sup> conductances in apical H<sup>+</sup>-K<sup>+</sup>-ATPase membrane. *Am. J. Physiol.* **246**, C537-C545.
- Zeiske, W., Onken, H., Schwarz, H.-J. and Graszynski, K.** (1992). Invertebrate epithelial Na<sup>+</sup> channels: Amiloride-induced current-noise in crab gill. *Biochim. Biophys. Acta* **1105**, 245-252.
